# Supplementary material for: De novo characterization of Larix gmelinii (Rupr.) Rupr. transcriptome and analysis of its gene expression induced by jasmonates
Source: PubMed Central journal article supplement (PMC3765852; doi:10.1186/1471-2164-14-548), 2013-08-13
Supplement: 1471-2164-14-548-S8.pdf [file 1471-2164-14-548-S8.pdf]

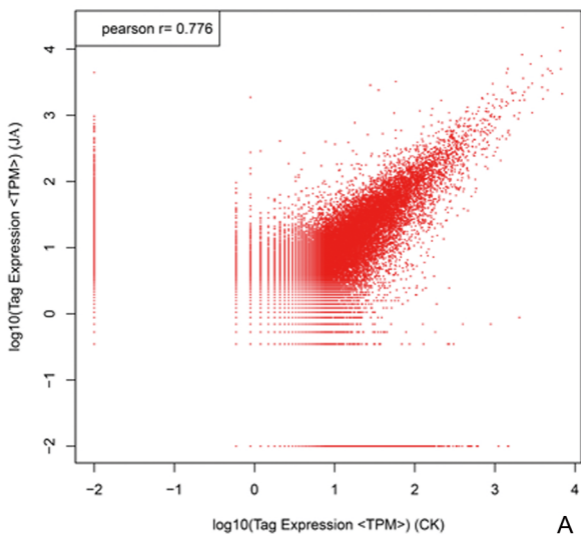

A

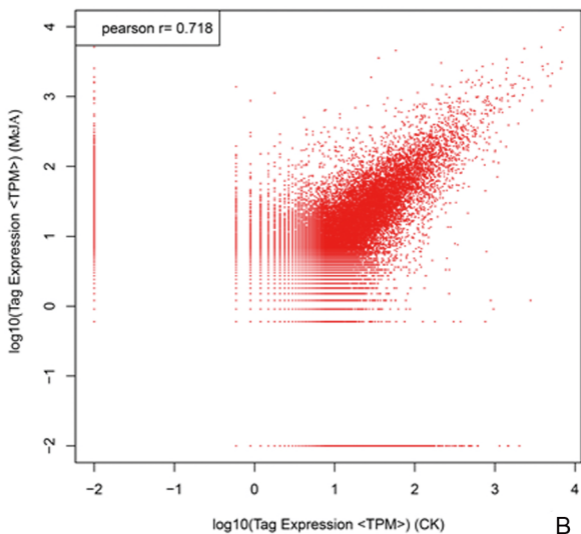

B
