# Supplementary material for: De novo characterization of Larix gmelinii (Rupr.) Rupr. transcriptome and analysis of its gene expression induced by jasmonates
Source: PubMed Central journal article supplement (PMC3765852; doi:10.1186/1471-2164-14-548), 2013-08-13
Supplement: 1471-2164-14-548-S18.pdf [file 1471-2164-14-548-S18.pdf]

## Differential gene expression of Phenylpropanoid biosynthesis

|                                     | CK vs. JA        |                                                                                       |                                                                                                      |           | CK vs. MeJA      |                                                                                       |                                                                                                      |           |
|-------------------------------------|------------------|---------------------------------------------------------------------------------------|------------------------------------------------------------------------------------------------------|-----------|------------------|---------------------------------------------------------------------------------------|------------------------------------------------------------------------------------------------------|-----------|
|                                     | Gene ID          | Nr annotation                                                                         | Swissprot annotation                                                                                 | log2Ratio | Gene ID          | Nr annotation                                                                         | Swissprot annotation                                                                                 | log2Ratio |
| Phenylalanine<br>ammonialyase       | Unigene<br>46956 | phenylalanine<br>aminomutase<br>[ <i>Taxus wallichiana</i><br>var. <i>chinensis</i> ] | Phenylalanine<br>ammonia-lyase<br>[ <i>Pinus taeda</i> ]                                             | +4.8      | Unigene<br>46956 | phenylalanine<br>aminomutase<br>[ <i>Taxus wallichiana</i><br>var. <i>chinensis</i> ] | Phenylalanine<br>ammonia-lyase<br>[ <i>Pinus taeda</i> ]                                             | +5.7      |
| Trans-cinnamate<br>4-monooxygenase  | Unigene<br>47342 | cinnamate<br>4-hydroxylase<br>[ <i>Ipomoea batatas</i> ]                              | Trans-cinnamate<br>4-monooxygenase<br>[ <i>Glycyrrhiza echinata</i> ]                                | -1.1      | Unigene<br>47342 | cinnamate<br>4-hydroxylase<br>[ <i>Ipomoea batatas</i> ]                              | Trans-cinnamate<br>4-monooxygenase<br>[ <i>Glycyrrhiza echinata</i> ]                                | -1.3      |
| coumarate<br>3-hydroxylase          | Unigene<br>42617 | coumarate<br>3-hydroxylase [ <i>Pinus taeda</i> ]                                     | Cytochrome P450<br>98A2 [ <i>Glycine max</i> ]                                                       | -2.5      | Unigene<br>42617 | coumarate<br>3-hydroxylase<br>[ <i>Pinus taeda</i> ]                                  | Cytochrome P450<br>98A2 [ <i>Glycine max</i> ]                                                       | +1.9      |
| Coniferyl-aldehyde<br>dehydrogenase | Unigene<br>43337 | cytosolic aldehyde<br>dehydrogenase<br>[ <i>Oryza sativa</i><br>Japonica Group]       | Aldehyde<br>dehydrogenase family<br>2 member B7,<br>mitochondrial<br>[ <i>Arabidopsis thaliana</i> ] | -1.3      | Unigene<br>43337 | cytosolic<br>aldehyde<br>dehydrogenase<br>[ <i>Oryza sativa</i><br>Japonica Group]    | Aldehyde<br>dehydrogenase<br>family 2 member B7,<br>mitochondrial<br>[ <i>Arabidopsis thaliana</i> ] | -1.1      |

+ means up-regulated; - means down-regulated, log2Ratio: multiples of differentially expressed.
